# Supplementary material for: Substituent effect on the interaction of aromatic primary amines and diamines with supercritical CO2 from infrared spectroscopy and quantum calculations
Source: Royal Society of Chemistry journal article supplement (doi:10.1039/b818956k), 2009-01-01
Supplement: b818956k.pdf [file b818956k.pdf]

**Supplementary Information**

Table S1. Aromatic amines investigated in this study

| Monoamines                                                                          |                                                                                                    | Diamines                                                                            |                                                                             |
|-------------------------------------------------------------------------------------|----------------------------------------------------------------------------------------------------|-------------------------------------------------------------------------------------|-----------------------------------------------------------------------------|
| 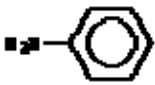   | Aniline (Ani) :<br>Aldrich ≥99.5%                                                                  | 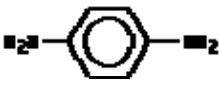   | 1,4-Benzenediamine<br>(pNH2) : Fluka technical,<br>≥97.0% (GC/NT)           |
| 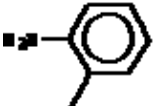   | 2-methyl aniline<br>(oCH3) : Aldrich<br>≥99%                                                       | 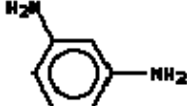   | 1,3-Benzenediamine<br>(mNH2) : Aldrich flakes,<br>≥99%                      |
| 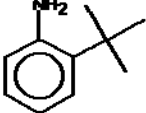   | 2-tertbutyl aniline<br>(otBu) : Aldrich<br>99%                                                     | 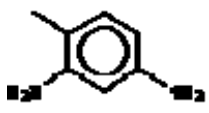   | 1,3-Benzenediamine, 4-<br>methyl (oCH3mNH2) :<br>Aldrich 98%                |
| 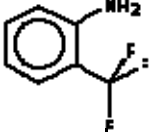   | 2-trifluoromethyl<br>aniline (oCF3) :<br>Aldrich 99%                                               | 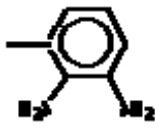   | 1,2-Benzenediamine, 3-<br>methyl (oCH3oNH2) :<br>Aldrich 97%                |
| 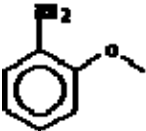   | 2-methoxy aniline<br>(oOMe) :<br>OEKANAL <sup>®</sup> ,<br>analytical standard<br>(Riedel-de Haën) | 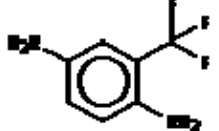   | 1,4-Benzenediamine ,2-<br>(trifluoromethyl)<br>(oCF3pNH2) : Aldrich 97%     |
| 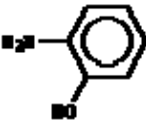 | 2-hydroxy aniline<br>(oOH) : Fluka<br>puriss., ≥99.0%<br>(NT)                                      | 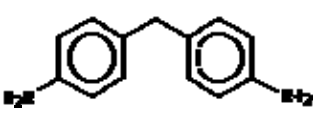 | Benzenamine, 4,4'-<br>methylenebis (diPhpNH2) :<br>Fluka purum, ≥97.0% (GC) |
| 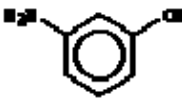 | 3-hydroxy aniline<br>(mOH) : Fluka<br>purum, ≥98.0%<br>(T)                                         |                                                                                     |                                                                             |

**Table S2.** Concentration and demixing pressures for the aromatic amines investigated in this study (the melting point of each chemical is reported for information).

| Amine                             | Concentration (mmol/L) | Demixing pressure (MPa) | Melting point (°C) |
|-----------------------------------|------------------------|-------------------------|--------------------|
| Monoamines                        |                        |                         |                    |
| Ani                               | 5.1                    | 8.0                     | −6                 |
| oCH <sub>3</sub>                  | 4.3                    | 8.0                     | −28                |
| otBu                              | 3.0                    | 8.0                     | −60                |
| oCF <sub>3</sub>                  | 3.7                    | 8.0                     | −31                |
| oOMe                              | 4.1                    | 8.8                     | 5                  |
| oOH                               | 7.3                    | 30.0                    | 173                |
| mOH                               | 7.6                    | 30.0                    | 122                |
| Diamines                          |                        |                         |                    |
| pNH <sub>2</sub>                  | 4.7                    | 30.0                    | 141                |
| mNH <sub>2</sub>                  | 7.8                    | 30.0                    | 65                 |
| oCH <sub>3</sub> mNH <sub>2</sub> | 7.1                    | 30.0                    | 98                 |
| oCH <sub>3</sub> oNH <sub>2</sub> | 6.7                    | 11.0                    | 62                 |
| oCF <sub>3</sub> pNH <sub>2</sub> | 3.5                    | 9.4                     | 56                 |
| diPhpNH <sub>2</sub>              | 3.1                    | 30.0                    | 90                 |

Figure S1: Optimized structure of the amine-CO<sub>2</sub> complexes at the B3LYP and MP2 level  
using the aug-cc-pVDZ basis set.

| Amines   | B3LYP                                                                               | MP2                                                                                  |
|----------|-------------------------------------------------------------------------------------|--------------------------------------------------------------------------------------|
| (A) Ani  | 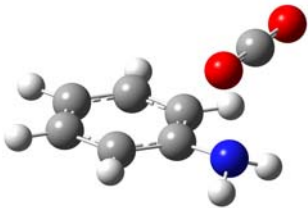   | 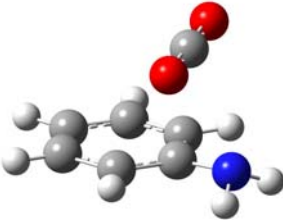   |
| (B) oCH3 | 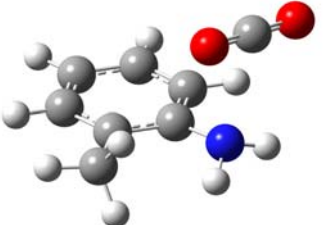  | 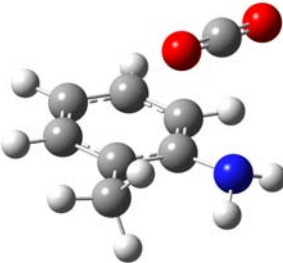  |
| (C) otBu | 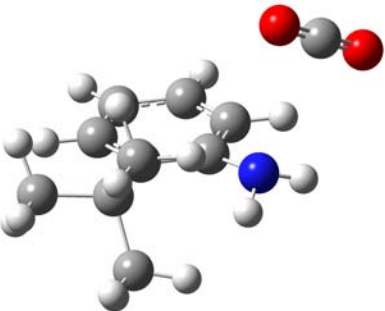 | 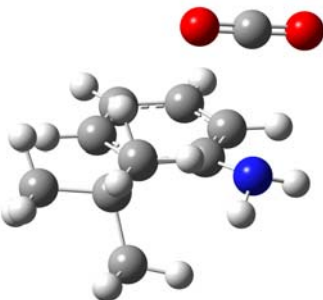 |
| (D) oCF3 | 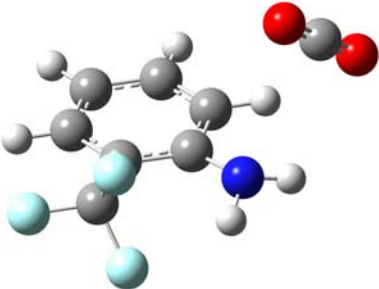 | 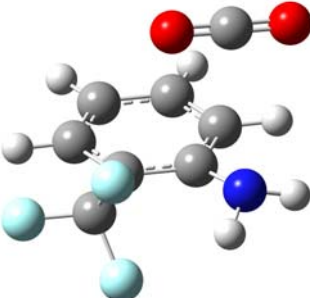 |

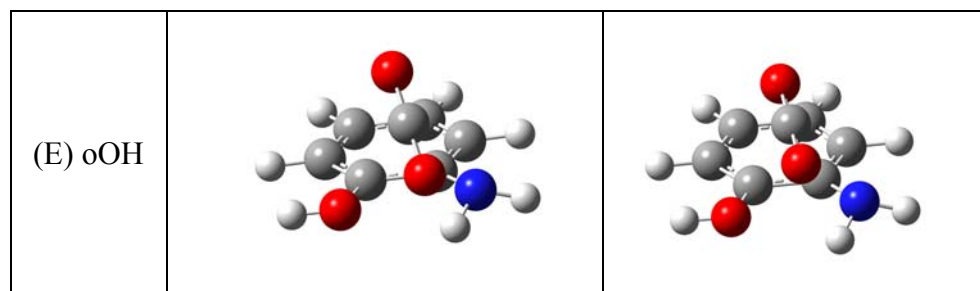

**Figure S2.** Comparison of the calculated frequencies (unscaled) of the  $\nu_1$  band of monoamines and their complex with  $\text{CO}_2$  at the B3LYP/Aug-cc-pVDZ and MP2/Aug-cc-pVDZ computational level.

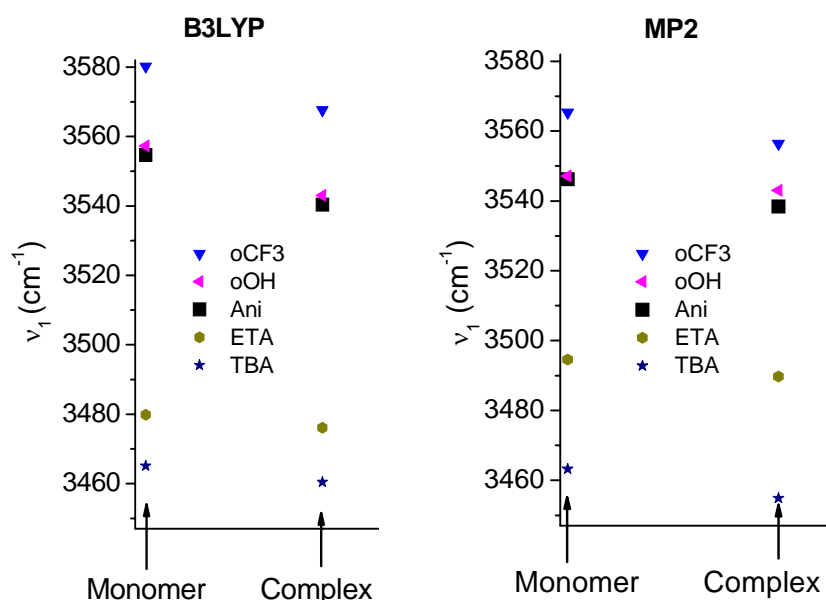

In order to validate the frequency calculations performed in the DFT approximation, we have also performed a vibrational analysis of few monoamines (Ani, oOH, oCF3, ETA, TBA) and their complexes with  $\text{CO}_2$  using ab-initio method at the MP2 level. The unscaled calculated frequencies at the B3LYP and MP2 level associated with the symmetric stretching mode ( $\nu_1$ ) of the  $\text{NH}_2$  group of the amines and their complexes with  $\text{CO}_2$  are compared on figure S2. We observe that the predicted frequencies using the two different methods agree nicely. Indeed, although the absolute values of ( $\nu_1$ ) are not strictly the same, we observe that the frequency values follow the same order:  $\nu_1(\text{oCF3}) > \nu_1(\text{oOH}) > \nu_1(\text{Ani}) > \nu_1(\text{ETA}) > \nu_1(\text{TBA})$ . Moreover, the shift to lower frequencies upon the complex formation is reproduced by both types of calculations. Therefore, although the DFT method do not estimate accurately dispersion forces, the vibrational behavior of the  $\text{NH}_2$  group in theses amines and their complexes with  $\text{CO}_2$  is well reproduced by the B3LYP method. This result is somehow coherent with the fact that the  $\text{NH}_2$  group is primarily influence by the EDA interactions occurring between  $\text{CO}_2$  and the amines, which have been shown to be well accounted by the B3LYP method.
